# Supplementary material for: Seasonal Variation in the Intake of Food Groups and Nutrients in Japan: A Systematic Review and Meta-analysis
Source: PubMed Central journal article supplement (PMC11706675; doi:10.2188/jea.je20240139), 2025-02-05
Supplement: je-35-053-s001.pdf [file je-35-053-s001.pdf]

**eTable 1. Risk of bias assessment<sup>a</sup>**

| No.                       | Item                                                                                                                                                                                | References     |     |    |    |    |     |    |     |     |     |
|---------------------------|-------------------------------------------------------------------------------------------------------------------------------------------------------------------------------------|----------------|-----|----|----|----|-----|----|-----|-----|-----|
|                           |                                                                                                                                                                                     | 2              | 3   | 4  | 24 | 25 | 26  | 29 | 30  | 31  | 32  |
| 1                         | Were the aims/objectives of the study clear?                                                                                                                                        | 1              | 1   | 1  | 1  | 1  | 1   | 1  | 1   | 1   | 1   |
| 2                         | Was dietary intake examined for more than 90% of the same individuals over four seasons?                                                                                            | 1              | 1   | 1  | 1  | 1  | 1   | 1  | 1   | 1   | 1   |
| 3                         | Was the sample size justified?                                                                                                                                                      | 1 <sup>b</sup> | 0   | 0  | 0  | 0  | 0   | 0  | 0   | 0   | 0   |
| 4                         | Was the target/reference population clearly defined at least for sex, age, research area, and recruitment method? (Is it clear who the research was about?)                         | 1 <sup>b</sup> | 1   | 1  | 1  | 1  | 1   | 1  | 0   | 0   | 1   |
| 5                         | Was the sample frame appropriate for investigating the seasonal variation among the Japanese population (i.e. both sexes and not too specific)?                                     | 1 <sup>b</sup> | 0   | 1  | 0  | 0  | 1   | 0  | 1   | 0   | 1   |
| 6                         | Was the selection process likely to select subjects/participants that were representative of the target/reference population under investigation?                                   | 1 <sup>b</sup> | 1   | 1  | 0  | 0  | 1   | 1  | 1   | 0   | 1   |
| 7                         | Were measures undertaken to address and categorise non-responders?                                                                                                                  | 0              | 0   | 0  | 0  | 0  | 0   | 0  | 0   | 0   | 0   |
| 8                         | Was the definition of seasons defined?                                                                                                                                              | 1 <sup>b</sup> | 1   | 1  | 1  | 1  | 1   | 1  | 1   | 0   | 0   |
| 9                         | Was the dietary intake weighed and checked by the trained research staff?                                                                                                           | 1              | 1   | 1  | 1  | 0  | 1   | 0  | 1   | 1   | 1   |
| 10                        | Is it clear what was used to determined statistical significance and/or precision estimates on dietary intake in each season? (e.g. p values, CIs)                                  | 1              | 1   | 1  | 1  | 1  | 1   | 1  | 1   | 1   | 1   |
| 11                        | Were the dietary survey methods (the number of dietary survey days and whether they were consecutive) and statistical methods sufficiently described to enable them to be repeated? | 1              | 1   | 1  | 1  | 0  | 1   | 1  | 1   | 1   | 1   |
| 12                        | Were the basic data (at least age and sex) adequately described?                                                                                                                    | 1 <sup>b</sup> | 1   | 1  | 1  | 1  | 1   | 1  | 1   | 1   | 1   |
| 13                        | Does the response rate raise concerns about non-response bias?                                                                                                                      | N/A            | N/A | 1  | 1  | 1  | N/A | 0  | N/A | N/A | N/A |
| 14                        | If appropriate, was information about non-responders described?                                                                                                                     | 0              | 0   | 0  | 0  | 1  | 0   | 1  | 0   | 0   | 0   |
| 15                        | Were the results internally consistent?                                                                                                                                             | 1              | 1   | 1  | 1  | 1  | 1   | 1  | 1   | 1   | 1   |
| 16                        | Were the results of the analyses described in the methods presented?                                                                                                                | 1              | 1   | 1  | 1  | 1  | 1   | 1  | 1   | 1   | 1   |
| 17                        | Was the number of survey days multiplied by the number of participants over 150?                                                                                                    | 1              | 1   | 0  | 1  | 0  | 1   | 1  | 1   | 1   | 1   |
| Total (Maximum 17 points) |                                                                                                                                                                                     | 14             | 12  | 13 | 12 | 10 | 13  | 12 | 12  | 9   | 12  |

<sup>a</sup>Quality assessment was conducted by using AXIS tool with modifications. N/A was converted to zero in the total score calculation.

<sup>b</sup>This information was extracted from the cohort profile paper published in the same issue. (Tsugane S, Sasaki S, Kobayashi M, et al. Validity and reproducibility of the self-administered food frequency questionnaire in the JPHC Study Cohort I: study design, conduct and participant profiles. *J Epidemiol.* 2003 Jan;13:S2–S12.)

**eTable 2.** Mean intake of energy and nutrients in each season

|                       | Unit        | Population            | Season |      |        |      |      |      |        |      |      |      | P-value | P-value detail                                     |
|-----------------------|-------------|-----------------------|--------|------|--------|------|------|------|--------|------|------|------|---------|----------------------------------------------------|
|                       |             |                       | Spring |      | Summer |      | Fall |      | Winter |      | ALL  |      |         |                                                    |
|                       |             |                       | mean   | SD   | mean   | SD   | mean | SD   | mean   | SD   | mean | SD   |         |                                                    |
| <b>Energy</b>         |             |                       |        |      |        |      |      |      |        |      |      |      |         |                                                    |
| Sasaki (2)            | kcal/day    | Males                 | 2447   | 457  | 2466   | 497  | 2491 | 449  | 2415   | 413  | 2455 | -    | 0.343   | Two-way ANOVA adjusted for area difference         |
| Sasaki (2)            | kcal/day    | Females               | 1892   | 365  | 1883   | 352  | 1900 | 311  | 1861   | 311  | 1884 | -    | 0.657   | Two-way ANOVA adjusted for area difference         |
| Tokudome (3)          | kcal/day    | Females               | 1811   | 348  | 1792   | 362  | 1852 | 346  | 1825   | 352  | 1820 | -    | <0.01   | ANOVA                                              |
| Owaki (4)             | kcal/day    | Males                 | 2232   | 558  | 2206   | 547  | 2087 | 477  | 2135   | 468  | 2165 | 345  | n.s.    | ANOVA                                              |
| Owaki (4)             | kcal/day    | Females               | 1808   | 359  | 1781   | 405  | 1714 | 326  | 1769   | 375  | 1768 | 323  | n.s.    | ANOVA                                              |
| Nozue (24)            | kcal/day    | Males                 | 2413   | 525  | 2433   | 545  | N/A  | N/A  | 2333   | 464  | 2393 | -    | -       | Paired t tests were conducted for each two seasons |
| Nozue (24)            | kcal/day    | Females               | 1923   | 420  | 1894   | 339  | N/A  | N/A  | 1917   | 410  | 1911 | -    | -       | Paired t tests were conducted for each two seasons |
| Miyai (25)            | kcal/day    | Normal weight Females | 1667   | 297  | 1575   | 206  | 1652 | 265  | 1689   | 268  | 1646 | 155  | 0.363   | Paired friedman test                               |
| Miyai (25)            | kcal/day    | Overweight Females    | 1656   | 262  | 1893   | 207  | 1684 | 284  | 1707   | 296  | 1735 | 167  | 0.284   | Paired friedman test                               |
| Amano (29)            | kcal/day    | Females               | 1647   | 314  | 1401   | 303  | 1639 | 393  | 1536   | 250  | 1556 | -    | n.s.    | ANOVA                                              |
| Ishiwaki (30)         | kcal/day    | Males                 | 2396   | 456  | 2407   | 488  | 2346 | 471  | 2366   | 493  | 2379 | 404  | >0.05   | ANOVA                                              |
| Ishiwaki (30)         | kcal/day    | Females               | 1880   | 344  | 1864   | 391  | 1867 | 358  | 1871   | 363  | 1870 | 307  | >0.05   | ANOVA                                              |
| Minari (31)           | kcal/day    | Females               | 1827   | 69   | 1615   | 102  | 1605 | 73   | 1852   | 279  | 1725 | -    | <0.05   | Steel-Dwass's multiple comparison test             |
| Akimoto (32)          | kcal/day    | Males and Females     | 1911   | 549  | 1887   | 454  | 1935 | 478  | 1959   | 406  | 1923 | -    | 0.48    | Mixed effect model                                 |
| <b>Protein</b>        |             |                       |        |      |        |      |      |      |        |      |      |      |         |                                                    |
| Sasaki (2)            | g/day       | Males                 | 95.3   | 16.5 | 95.5   | 17.5 | 97.2 | 16.8 | 97.2   | 18.6 | 96.3 | -    | 0.495   | Two-way ANOVA adjusted for area difference         |
| Sasaki (2)            | g/day       | Females               | 78.8   | 14.3 | 77.4   | 13.7 | 78.7 | 12.9 | 79.1   | 15.4 | 78.5 | -    | 0.634   | Two-way ANOVA adjusted for area difference         |
| Tokudome (3)          | g/day       | Females               | 73.6   | 17.9 | 73.1   | 18.1 | 75.7 | 15.9 | 74.8   | 17.3 | 74.3 | -    | <0.01   | ANOVA                                              |
| Owaki (4)             | g/day       | Males                 | 83.2   | 22.5 | 83.7   | 26.5 | 81   | 23.7 | 80.9   | 19.2 | 82.2 | 15.1 | n.s.    | ANOVA                                              |
| Owaki (4)             | g/day       | Females               | 73.0   | 18.2 | 71.7   | 18.2 | 68.9 | 17.7 | 71.2   | 20.8 | 71.2 | 16.1 | n.s.    | ANOVA                                              |
| Nozue (24)            | g/day       | Males                 | 90.3   | 20.3 | 87.3   | 21.8 | N/A  | N/A  | 85.8   | 16.9 | 87.8 | -    | -       | Paired t tests were conducted for each two seasons |
| Nozue (24)            | g/day       | Females               | 76.4   | 18.0 | 71.7   | 17.1 | N/A  | N/A  | 73.4   | 16.8 | 73.8 | -    | -       | Paired t tests were conducted for each two seasons |
| Amano (29)            | g/1000 kcal | Females               | 37.9   | 5.8  | 37.2   | 5.0  | 37.6 | 5.5  | 37     | 5.1  | 58.1 | -    | n.s.    | ANOVA                                              |
| Ishiwaki (30)         | g/day       | Males                 | 92.4   | 19.7 | 88.9   | 20.5 | 87.1 | 18.9 | 89.0   | 20.3 | 89.3 | 16.3 | <0.01   | ANOVA                                              |
| Ishiwaki (30)         | g/day       | Females               | 76.5   | 15.8 | 73.8   | 18.1 | 73.9 | 16.7 | 74.3   | 17   | 74.6 | 14.1 | >0.05   | ANOVA                                              |
| Minari (31)           | g/day       | Females               | 68.9   | 4.7  | 63.1   | 4.8  | 62.9 | 3.7  | 75.3   | 16.4 | 67.6 | -    | <0.05   | Steel-Dwass's multiple comparison test             |
| Akimoto (32)          | g/1000 kcal | Males and Females     | 36.0   | 5.0  | 35.6   | 4.6  | 36.0 | 5.0  | 36.0   | 5.0  | 35.9 | -    | 1.00    | Mixed effect model                                 |
| <b>Animal protein</b> |             |                       |        |      |        |      |      |      |        |      |      |      |         |                                                    |
| Owaki (4)             | g/day       | Males                 | 38.6   | 17.4 | 39.1   | 22.5 | 40.9 | 19.7 | 40.3   | 16.5 | 39.7 | 13.7 | n.s.    | ANOVA                                              |
| Owaki (4)             | g/day       | Females               | 34.1   | 14.3 | 33.5   | 14.9 | 33.4 | 15.6 | 34.7   | 17.7 | 33.9 | 12.8 | n.s.    | ANOVA                                              |
| Nozue (24)            | g/day       | Males                 | 49.1   | 15.8 | 46.8   | 17.5 | N/A  | N/A  | 46.1   | 13.9 | 47.3 | -    | -       | Paired t test                                      |
| Nozue (24)            | g/day       | Females               | 39.5   | 13.9 | 36.5   | 15.1 | N/A  | N/A  | 37.0   | 13.5 | 37.7 | -    | -       | Paired t test                                      |

eTable 2. Cont.

|                                        | Unit        | Population        | Season |      |        |      |      |      |        |      |      |      | P-value | P-value detail                                     |  |
|----------------------------------------|-------------|-------------------|--------|------|--------|------|------|------|--------|------|------|------|---------|----------------------------------------------------|--|
|                                        |             |                   | Spring |      | Summer |      | Fall |      | Winter |      | ALL  |      |         |                                                    |  |
|                                        |             |                   | mean   | SD   | mean   | SD   | mean | SD   | mean   | SD   | mean | SD   |         |                                                    |  |
| <b>Fat</b>                             |             |                   |        |      |        |      |      |      |        |      |      |      |         |                                                    |  |
| Sasaki (2)                             | g/day       | Males             | 57     | 11.8 | 58.1   | 11.7 | 58.3 | 13.7 | 58.3   | 14.1 | 57.9 | -    | 0.814   | Two-way ANOVA adjusted for area difference         |  |
| Sasaki (2)                             | g/day       | Females           | 52     | 11.3 | 52.9   | 11   | 50.4 | 9.2  | 52.5   | 11.4 | 52.0 | -    | 0.187   | Two-way ANOVA adjusted for area difference         |  |
| Tokudome (3)                           | g/day       | Females           | 55.9   | 18.6 | 54.9   | 19.4 | 58.7 | 19.1 | 55.5   | 18.5 | 56.3 | -    | <0.001  | ANOVA                                              |  |
| Owaki (4)                              | g/day       | Males             | 55.1   | 23.5 | 54.8   | 21.7 | 47.4 | 15.9 | 49.5   | 19.4 | 54.5 | 14.9 | <0.05   | ANOVA                                              |  |
| Owaki (4)                              | g/day       | Females           | 50.3   | 19.4 | 50.0   | 20.4 | 44.6 | 15.2 | 47.7   | 19.9 | 48.2 | 16.0 | n.s.    | ANOVA                                              |  |
| Nozue (24)                             | g/day       | Males             | 60.5   | 21.2 | 63.4   | 24.7 | N/A  | N/A  | 55.6   | 21.0 | 59.8 | -    | -       | Paired t tests were conducted for each two seasons |  |
| Nozue (24)                             | g/day       | Females           | 51.3   | 19.4 | 50.1   | 15.3 | N/A  | N/A  | 48.9   | 18.2 | 50.1 | -    | -       | Paired t tests were conducted for each two seasons |  |
| Amano (29)                             | g/1000 kcal | Females           | 35.1   | 6.0  | 32.9   | 5.4  | 33.9 | 5.8  | 34.2   | 5.7  | 34.3 | -    | n.s.    | ANOVA                                              |  |
| Ishiwaki (30)                          | g/day       | Males             | 58.9   | 16.7 | 59.5   | 18.9 | 57.4 | 20.4 | 58.4   | 19.0 | 58.5 | 14.5 | >0.05   | ANOVA                                              |  |
| Ishiwaki (30)                          | g/day       | Females           | 52.2   | 15.8 | 50.7   | 14.9 | 50.3 | 17.6 | 50.8   | 15.5 | 51.0 | 12.3 | >0.05   | ANOVA                                              |  |
| Minari (31)                            | %E          | Females           | 27.7   | 1.0  | 26.6   | 1.6  | 23.5 | 2.1  | 28.8   | 4.2  | 26.7 | -    | <0.05   | Steel-Dwass's multiple comparison test             |  |
| Akimoto (32)                           | g/1000 kcal | Males and Females | 32.7   | 6.3  | 31.4   | 5.9  | 32.2 | 5.9  | 31.8   | 6.3  | 32.0 | -    | 0.35    | Mixed effect model                                 |  |
| <b>Animal fat</b>                      |             |                   |        |      |        |      |      |      |        |      |      |      |         |                                                    |  |
| Owaki (4)                              | g/day       | Males             | 19.8   | 15.6 | 16.7   | 11.8 | 17.0 | 10.8 | 20.2   | 12.5 | 18.4 | 9.8  | n.s.    | ANOVA                                              |  |
| Owaki (4)                              | g/day       | Females           | 18.5   | 12.7 | 16.8   | 12.6 | 17.8 | 11.1 | 19.2   | 14.5 | 18.1 | 10.3 | n.s.    | ANOVA                                              |  |
| Nozue (24)                             | g/day       | Males             | 31.4   | 14.8 | 30.2   | 13.2 | N/A  | N/A  | 28.6   | 12.2 | 30.1 | -    | -       | Paired t tests were conducted for each two seasons |  |
| Nozue (24)                             | g/day       | Females           | 25.2   | 11.9 | 23.9   | 10.8 | N/A  | N/A  | 22.9   | 10.0 | 24.0 | -    | -       | Paired t tests were conducted for each two seasons |  |
| <b>Saturated fatty acids</b>           |             |                   |        |      |        |      |      |      |        |      |      |      |         |                                                    |  |
| Tokudome (3)                           | g/day       | Females           | 15.3   | 6.0  | 15.1   | 6.6  | 16.4 | 6.9  | 15.6   | 6.6  | 15.6 | -    | <0.01   | ANOVA                                              |  |
| Owaki (4)                              | g/day       | Males             | 11.7   | 5.6  | 12.3   | 5.7  | 11.1 | 5.1  | 11.6   | 5.8  | 11.7 | 4.7  | n.s.    | ANOVA                                              |  |
| Owaki (4)                              | g/day       | Females           | 11.2   | 5.0  | 11.5   | 6.1  | 11.0 | 5.2  | 11.9   | 6.6  | 11.4 | 4.7  | n.s.    | ANOVA                                              |  |
| Amano (29)                             | g/1000 kcal | Females           | 9.7    | 2.6  | 9.0    | 2.0  | 9.8  | 2.5  | 9.4    | 2.2  | 9.6  | -    | n.s.    | ANOVA                                              |  |
| Akimoto (32)                           | g/1000 kcal | Males and Females | 9.2    | 2.1  | 9.2    | 2.1  | 9.2  | 2.1  | 9.2    | 2.5  | -    | -    | 0.92    | Mixed effect model                                 |  |
| <b>Monounsaturated fatty acids</b>     |             |                   |        |      |        |      |      |      |        |      |      |      |         |                                                    |  |
| Tokudome (3)                           | g/day       | Females           | 19.1   | 7.6  | 18.7   | 7.7  | 19.7 | 7.6  | 18.9   | 7.6  | 19.1 | -    | <0.05   | ANOVA                                              |  |
| Owaki (4)                              | g/day       | Males             | 16.0   | 7.9  | 18.1   | 8.4  | 14.3 | 6.4  | 14.6   | 7.1  | 15.7 | 6.2  | <0.01   | ANOVA                                              |  |
| Owaki (4)                              | g/day       | Females           | 14.2   | 6.0  | 15.8   | 7.9  | 13.2 | 5.7  | 14.3   | 7.5  | 14.4 | 5.6  | <0.05   | ANOVA                                              |  |
| Amano (29)                             | g/1000 kcal | Females           | 12.4   | 2.9  | 11.5   | 2.5  | 11.7 | 2.7  | 12.0   | 2.6  | 12.0 | -    | n.s.    | ANOVA                                              |  |
| Akimoto (32)                           | g/1000 kcal | Males and Females | 12.1   | 2.9  | 11.7   | 2.5  | 12.1 | 2.5  | 11.7   | 2.5  | -    | -    | 0.37    | Mixed effect model                                 |  |
| <b>Polyunsaturated fatty acids</b>     |             |                   |        |      |        |      |      |      |        |      |      |      |         |                                                    |  |
| Tokudome (3)                           | g/day       | Females           | 13.1   | 5.1  | 13.0   | 5.2  | 13.8 | 5.4  | 12.7   | 4.9  | 13.2 | -    | <0.01   | ANOVA                                              |  |
| Owaki (4)                              | g/day       | Males             | 13.1   | 6.3  | 14.4   | 6.0  | 11.2 | 4.0  | 11.0   | 6.1  | 12.4 | 4.9  | <0.01   | ANOVA                                              |  |
| Owaki (4)                              | g/day       | Females           | 11.8   | 4.7  | 12.3   | 5.5  | 9.9  | 3.8  | 11.0   | 5.5  | 11.3 | 4.4  | <0.01   | ANOVA                                              |  |
| Amano (29)                             | g/1000 kcal | Females           | 7.5    | 1.9  | 7.0    | 2.0  | 7.0  | 1.9  | 6.8    | 1.6  | 7.1  | -    | <0.05   | ANOVA                                              |  |
| Akimoto (32)                           | g/1000 kcal | Males and Females | 7.1    | 5.4  | 6.7    | 5.4  | 7.1  | 5.4  | 7.1    | 5.4  | -    | -    | 0.09    | Mixed effect model                                 |  |
| <b>n-6 Polyunsaturated fatty acids</b> |             |                   |        |      |        |      |      |      |        |      |      |      |         |                                                    |  |
| Tokudome (3)                           | g/day       | Females           | 10.7   | 4.4  | 10.6   | 4.5  | 11.0 | 4.8  | 10.2   | 4.1  | 10.6 | -    | <0.01   | ANOVA                                              |  |

**eTable 2. Cont.**

|                                        | Unit         | Population        | Season |     |        |     |      |     |        |     |      |     | P-value | P-value detail                                     |
|----------------------------------------|--------------|-------------------|--------|-----|--------|-----|------|-----|--------|-----|------|-----|---------|----------------------------------------------------|
|                                        |              |                   | Spring |     | Summer |     | Fall |     | Winter |     | ALL  |     |         |                                                    |
|                                        |              |                   | mean   | SD  | mean   | SD  | mean | SD  | mean   | SD  | mean | SD  |         |                                                    |
| <b>n-3 Polyunsaturated fatty acids</b> |              |                   |        |     |        |     |      |     |        |     |      |     |         |                                                    |
| Tokudome (3)                           | g/day        | Females           | 2.4    | 1.3 | 2.4    | 1.4 | 2.7  | 1.4 | 2.5    | 1.4 | 2.5  | -   | <0.001  | ANOVA                                              |
| <b>Cholesterol</b>                     |              |                   |        |     |        |     |      |     |        |     |      |     |         |                                                    |
| Sasaki (2)                             | mg/day       | Males             | 426    | 117 | 449    | 137 | 451  | 118 | 429    | 118 | 439  | -   | 0.47    | Two-way ANOVA adjusted for area difference         |
| Sasaki (2)                             | mg/day       | Females           | 360    | 108 | 379    | 121 | 376  | 105 | 367    | 109 | 371  | -   | 0.69    | Two-way ANOVA adjusted for area difference         |
| Tokudome (3)                           | mg/day       | Females           | 372    | 191 | 354    | 206 | 379  | 179 | 357    | 192 | 366  | -   | n.s.    | ANOVA                                              |
| Owaki (4)                              | mg/day       | Males             | 404    | 258 | 363    | 287 | 331  | 207 | 338    | 261 | 359  | 154 | n.s.    | ANOVA                                              |
| Owaki (4)                              | mg/day       | Females           | 324    | 192 | 304    | 217 | 271  | 180 | 276    | 187 | 294  | 176 | n.s.    | ANOVA                                              |
| Nozue (24)                             | mg/day       | Males             | 403    | 186 | 346    | 153 | N/A  | N/A | 373    | 163 | 374  | -   | -       | Paired t tests were conducted for each two seasons |
| Nozue (24)                             | mg/day       | Females           | 343    | 143 | 298    | 119 | N/A  | N/A | 316    | 146 | 319  | -   | -       | Paired t tests were conducted for each two seasons |
| Amano (29)                             | mg/1000 kcal | Females           | 230    | 70  | 218    | 71  | 215  | 80  | 205    | 86  | 217  | -   | n.s.    | ANOVA                                              |
| Akimoto (32)                           | mg/1000 kcal | Males and Females | 158    | 6   | 159    | 6   | 163  | 6   | 147    | 6   | -    | -   | 0.13    | Mixed effect model                                 |
| <b>Carbohydrate</b>                    |              |                   |        |     |        |     |      |     |        |     |      |     |         |                                                    |
| Sasaki (2)                             | g/day        | Males             | 341    | 82  | 346    | 99  | 351  | 81  | 332    | 73  | 343  | -   | 0.065   | Two-way ANOVA adjusted for area difference         |
| Sasaki (2)                             | g/day        | Females           | 273    | 65  | 271    | 65  | 281  | 60  | 266    | 51  | 273  | -   | 0.041   | Two-way ANOVA adjusted for area difference         |
| Tokudome (3)                           | g/day        | Females           | 243    | 53  | 240    | 53  | 246  | 52  | 246    | 52  | 244  | -   | n.s.    | ANOVA                                              |
| Owaki (4)                              | g/day        | Males             | 305    | 77  | 305    | 80  | 293  | 84  | 302    | 84  | 301  | 60  | n.s.    | ANOVA                                              |
| Owaki (4)                              | g/day        | Females           | 258    | 51  | 252    | 59  | 252  | 56  | 254    | 62  | 254  | 50  | n.s.    | ANOVA                                              |
| Nozue (24)                             | g/day        | Males             | 340    | 77  | 340    | 75  | N/A  | N/A | 337    | 72  | 339  | -   | -       | Paired t tests were conducted for each two seasons |
| Nozue (24)                             | g/day        | Females           | 280    | 68  | 284    | 50  | N/A  | N/A | 291    | 67  | 285  | -   | -       | Paired t tests were conducted for each two seasons |
| Amano (29)                             | g/1000 kcal  | Females           | 129    | 14  | 134    | 14  | 132  | 14  | 132    | 14  | 131  | -   | <0.05   | ANOVA                                              |
| Minari (31)                            | %E           | Females           | 57.2   | 1.0 | 57.8   | 2.1 | 60.7 | 2.1 | 55.0   | 4.8 | 58   | -   | <0.05   | Steel-Dwass's multiple comparison test             |
| Akimoto (32)                           | g/1000 kcal  | Males and Females | 131    | 16  | 134    | 15  | 134  | 16  | 133    | 15  | -    | -   | 0.55    | Mixed effect model                                 |
| <b>Total fiber</b>                     |              |                   |        |     |        |     |      |     |        |     |      |     |         |                                                    |
| Tokudome (3)                           | g/day        | Females           | 15.1   | 5.4 | 14.7   | 5.3 | 16.4 | 5.4 | 16.5   | 5.5 | 15.7 | -   | <0.001  | ANOVA                                              |
| Owaki (4)                              | g/day        | Males             | 13.5   | 4.5 | 12.1   | 4.2 | 12.0 | 4.0 | 11.2   | 4.1 | 12.2 | 3.8 | <0.01   | ANOVA                                              |
| Owaki (4)                              | g/day        | Females           | 13.1   | 5.0 | 11.6   | 4.2 | 11.6 | 3.9 | 12     | 5.5 | 12.1 | 3.8 | <0.05   | ANOVA                                              |
| Nozue (24)                             | g/day        | Males             | 17.0   | 5.0 | 17.8   | 5.5 | N/A  | N/A | 18.4   | 5.4 | 17.7 | -   | -       | Paired t tests were conducted for each two seasons |
| Nozue (24)                             | g/day        | Females           | 16.4   | 6.0 | 17.6   | 4.6 | N/A  | N/A | 19.1   | 5.1 | 17.7 | -   | -       | Paired t tests were conducted for each two seasons |
| Amano (29)                             | g/1000 kcal  | Females           | 6.4    | 1.8 | 6.1    | 1.5 | 6.8  | 1.9 | 6.3    | 2.0 | 6.5  | -   | n.s.    | ANOVA                                              |
| Minari (31)                            | g/1000 kcal  | Females           | 13.4   | 1.6 | 12.8   | 1.6 | 13.9 | 1.1 | 16.8   | 4.2 | 14.2 | -   | <0.05   | Steel-Dwass's multiple comparison test             |
| Akimoto (32)                           | g/1000 kcal  | Males and Females | 7.1    | 5.9 | 6.7    | 5.9 | 7.5  | 5.9 | 7.1    | 5.9 | -    | -   | 0.33    | Mixed effect model                                 |
| <b>Soluble dietary fiber</b>           |              |                   |        |     |        |     |      |     |        |     |      |     |         |                                                    |
| Tokudome (3)                           | g/day        | Females           | 2.7    | 1.4 | 3.0    | 1.5 | 3.2  | 1.5 | 3.3    | 1.1 | 3.1  | -   | <0.001  | ANOVA                                              |
| Owaki (4)                              | g/day        | Males             | 2.4    | 0.9 | 2.0    | 1.0 | 2.2  | 1.0 | 2.1    | 0.9 | 2.2  | 0.9 | n.s.    | ANOVA                                              |
| Owaki (4)                              | g/day        | Females           | 2.4    | 1.1 | 2.0    | 1.0 | 2.2  | 0.9 | 2.2    | 1.1 | 2.2  | 0.8 | <0.05   | ANOVA                                              |
| Nozue (24)                             | g/day        | Males             | 3.8    | 1.3 | 4.3    | 1.5 | N/A  | N/A | 4.2    | 1.3 | 4.1  | -   | -       | Paired t tests were conducted for each two seasons |
| Nozue (24)                             | g/day        | Females           | 3.7    | 1.5 | 4.2    | 1.3 | N/A  | N/A | 4.5    | 1.4 | 4.1  | -   | -       | Paired t tests were conducted for each two seasons |
| Amano (29)                             | g/1000 kcal  | Females           | 1.6    | 0.8 | 1.4    | 0.4 | 1.6  | 0.6 | 1.5    | 0.5 | 1.5  | -   | n.s.    | ANOVA                                              |

**eTable 2. Cont.**

|                                | Unit           | Population | Season |       |        |       |      |       |        |       |       |     | P-value | P-value detail                                     |
|--------------------------------|----------------|------------|--------|-------|--------|-------|------|-------|--------|-------|-------|-----|---------|----------------------------------------------------|
|                                |                |            | Spring |       | Summer |       | Fall |       | Winter |       | ALL   |     |         |                                                    |
|                                |                |            | mean   | SD    | mean   | SD    | mean | SD    | mean   | SD    | mean  | SD  |         |                                                    |
| <b>Insoluble dietary fiber</b> |                |            |        |       |        |       |      |       |        |       |       |     |         |                                                    |
| Tokudome (3)                   | g/day          | Females    | 11.7   | 4     | 11.1   | 3.9   | 12.5 | 5.4   | 12.5   | 4.2   | 12.0  | -   | <0.001  | ANOVA                                              |
| Owaki (4)                      | g/day          | Males      | 10.8   | 3.7   | 9.4    | 3.2   | 9.3  | 2.9   | 8.9    | 3.1   | 9.6   | 3.1 | <0.01   | ANOVA                                              |
| Owaki (4)                      | g/day          | Females    | 10.2   | 3.5   | 8.7    | 3     | 9    | 3.1   | 9.3    | 4.1   | 9.3   | 2.8 | <0.05   | ANOVA                                              |
| Nozue (24)                     | g/day          | Males      | 13.2   | 3.8   | 13.5   | 4.1   | N/A  | N/A   | 14.2   | 4.2   | 13.6  | -   | -       | Paired t tests were conducted for each two seasons |
| Nozue (24)                     | g/day          | Females    | 12.7   | 4.6   | 13.3   | 3.4   | N/A  | N/A   | 14.6   | 3.9   | 13.5  | -   | -       | Paired t tests were conducted for each two seasons |
| Amano (29)                     | g/1000 kcal    | Females    | 4.5    | 1.2   | 4.3    | 1.1   | 4.7  | 1.3   | 4.4    | 1.6   | 4.6   | -   | n.s.    | ANOVA                                              |
| <b>Vitamin A</b>               |                |            |        |       |        |       |      |       |        |       |       |     |         |                                                    |
| Tokudome (3)                   | µgRE/day       | Females    | 715    | 677   | 707    | 642   | 824  | 807   | 779    | 627   | 756   | -   | <0.01   | ANOVA                                              |
| Owaki (4)                      | µgRE/day       | Males      | 707    | 769   | 649    | 730   | 807  | 1160  | 562    | 366   | 681   | 494 | n.s.    | ANOVA                                              |
| Owaki (4)                      | µgRE/day       | Females    | 685    | 685   | 701    | 727   | 835  | 1433  | 663    | 757   | 721   | 526 | n.s.    | ANOVA                                              |
| Nozue (24)                     | µgRE/day       | Males      | 951    | 383   | 1031   | 677   | N/A  | N/A   | 1159   | 884   | 1047  | -   | -       | Paired t tests were conducted for each two seasons |
| Nozue (24)                     | µgRE/day       | Females    | 918    | 479   | 953    | 502   | N/A  | N/A   | 1253   | 837   | 1041  | -   | -       | Paired t tests were conducted for each two seasons |
| Amano (29)                     | µgRE/1000 kcal | Females    | 449    | 278   | 382    | 191   | 463  | 275   | 390    | 183   | 427   | -   | n.s.    | ANOVA                                              |
| Minari (31)                    | µgRE/day       | Females    | 590    | 94    | 545    | 162   | 534  | 83    | 681    | 471   | 588   | -   | <0.05   | Steel-Dwass's multiple comparison test             |
| <b>Vitamin D</b>               |                |            |        |       |        |       |      |       |        |       |       |     |         |                                                    |
| Tokudome (3)                   | µg/day         | Females    | 7.4    | 8.6   | 6.9    | 8.6   | 7.8  | 9.3   | 7.4    | 9.4   | 7.4   | -   | n.s.    | ANOVA                                              |
| Owaki (4)                      | IU/day         | Males      | 122    | 197.9 | 149    | 252.1 | 118  | 155.7 | 96     | 175.1 | 121   | 134 | n.s.    | ANOVA                                              |
| Owaki (4)                      | IU/day         | Females    | 106    | 201.9 | 104    | 126   | 95   | 108.7 | 72     | 135.2 | 93    | 115 | n.s.    | ANOVA                                              |
| Nozue (24)                     | µg/day         | Males      | 9.6    | 5.8   | 12.3   | 10.0  | N/A  | N/A   | 9.9    | 5.6   | 10.6  | -   | -       | Paired t tests were conducted for each two seasons |
| Nozue (24)                     | µg/day         | Females    | 7.2    | 3.7   | 10.3   | 7.1   | N/A  | N/A   | 8.8    | 6.1   | 8.8   | -   | -       | Paired t tests were conducted for each two seasons |
| Amano (29)                     | µg/1000 kcal   | Females    | 4.0    | 3.0   | 4.0    | 3.0   | 4.0  | 3.0   | 3.0    | 2.0   | 3.9   | -   | n.s.    | ANOVA                                              |
| <b>Vitamin E</b>               |                |            |        |       |        |       |      |       |        |       |       |     |         |                                                    |
| Tokudome (3)                   | mg/day         | Females    | 8.7    | 3.1   | 9.0    | 3.2   | 9.2  | 3.4   | 8.6    | 3.1   | 8.9   | -   | <0.001  | ANOVA                                              |
| Owaki (4)                      | mg/day         | Males      | 8.2    | 3.7   | 9.1    | 3.9   | 7.5  | 3.00  | 6.7    | 3.1   | 7.9   | 2.8 | <0.01   | ANOVA                                              |
| Owaki (4)                      | mg/day         | Females    | 7.0    | 2.6   | 8.0    | 3.3   | 6.9  | 2.9   | 6.9    | 2.9   | 7.2   | 2.6 | <0.05   | ANOVA                                              |
| Nozue (24)                     | mg/day         | Males      | 12.1   | 11.6  | 10.9   | 3.7   | N/A  | N/A   | 9.5    | 3.3   | 10.8  | -   | -       | Paired t tests were conducted for each two seasons |
| Nozue (24)                     | mg/day         | Females    | 10.4   | 12.3  | 9.6    | 3.3   | N/A  | N/A   | 9.6    | 3.6   | 9.9   | -   | -       | Paired t tests were conducted for each two seasons |
| Amano (29)                     | mg/1000 kcal   | Females    | 4.7    | 1.0   | 4.5    | 1.2   | 4.5  | 1.0   | 4.3    | 1.1   | 4.6   | -   | n.s.    | ANOVA                                              |
| <b>Vitamin K</b>               |                |            |        |       |        |       |      |       |        |       |       |     |         |                                                    |
| Nozue (24)                     | µg/day         | Males      | 361    | 172   | 310    | 158   | N/A  | N/A   | 375    | 172   | 348.7 | -   | -       | Paired t tests were conducted for each two seasons |
| Nozue (24)                     | µg/day         | Females    | 317    | 156   | 280    | 119   | N/A  | N/A   | 362    | 194   | 319.7 | -   | -       | Paired t tests were conducted for each two seasons |
| Amano (29)                     | µg/1000 kcal   | Females    | 116    | 69    | 100    | 62    | 139  | 106   | 109    | 75    | 116   | -   | <0.01   | ANOVA                                              |

**eTable 2. Cont.**

|                               | Unit         | Population | Season |      |        |      |      |      |        |      | ALL  |      | P-value | P-value detail                                     |
|-------------------------------|--------------|------------|--------|------|--------|------|------|------|--------|------|------|------|---------|----------------------------------------------------|
|                               |              |            | Spring |      | Summer |      | Fall |      | Winter |      | mean | SD   |         |                                                    |
|                               |              |            | mean   | SD   | mean   | SD   | mean | SD   | mean   | SD   |      |      |         |                                                    |
| <b>Thiamine</b>               |              |            |        |      |        |      |      |      |        |      |      |      |         |                                                    |
| Sasaki (2)                    | mg/day       | Males      | 1.39   | 0.56 | 1.34   | 0.37 | 1.32 | 0.26 | 1.33   | 0.27 | 1.35 | -    | 0.394   | Two-way ANOVA adjusted for area difference         |
| Sasaki (2)                    | mg/day       | Females    | 1.16   | 0.34 | 1.14   | 0.24 | 1.12 | 0.23 | 1.15   | 0.29 | 1.14 | -    | 0.627   | Two-way ANOVA adjusted for area difference         |
| Owaki (4)                     | mg/day       | Males      | 0.78   | 0.25 | 0.80   | 0.29 | 0.73 | 0.31 | 0.76   | 0.28 | 0.77 | 0.20 | n.s.    | ANOVA                                              |
| Owaki (4)                     | mg/day       | Females    | 0.70   | 0.19 | 0.72   | 0.24 | 0.64 | 0.22 | 0.74   | 0.53 | 0.70 | 0.22 | n.s.    | ANOVA                                              |
| Nozue (24)                    | mg/day       | Males      | 1.18   | 0.9  | 1.19   | 0.7  | N/A  | N/A  | 1.15   | 0.8  | 1.17 | -    | -       | Paired t tests were conducted for each two seasons |
| Nozue (24)                    | mg/day       | Females    | 1.03   | 0.9  | 0.93   | 0.3  | N/A  | N/A  | 0.89   | 0.3  | 0.95 | -    | -       | Paired t tests were conducted for each two seasons |
| Amano (29)                    | mg/1000 kcal | Females    | 0.49   | 0.11 | 0.46   | 0.10 | 0.48 | 0.11 | 0.49   | 0.12 | 0.48 | -    | n.s.    | ANOVA                                              |
| Minari (31)                   | mg/day       | Females    | 0.86   | 0.10 | 0.80   | 0.05 | 0.81 | 0.11 | 1.05   | 0.21 | 0.88 | -    | <0.05   | Steel-Dwass's multiple comparison test             |
| <b>Riboflavin</b>             |              |            |        |      |        |      |      |      |        |      |      |      |         |                                                    |
| Sasaki (2)                    | mg/day       | Males      | 1.62   | 0.37 | 1.64   | 0.49 | 1.63 | 0.45 | 1.66   | 0.40 | 1.64 | -    | 0.822   | Two-way ANOVA adjusted for area difference         |
| Sasaki (2)                    | mg/day       | Females    | 1.43   | 0.30 | 1.43   | 0.31 | 1.41 | 0.30 | 1.47   | 0.34 | 1.44 | -    | 0.261   | Two-way ANOVA adjusted for area difference         |
| Owaki (4)                     | mg/day       | Males      | 1.07   | 0.34 | 1.07   | 0.42 | 1.04 | 0.41 | 0.95   | 0.31 | 1.03 | 0.28 | n.s.    | ANOVA                                              |
| Owaki (4)                     | mg/day       | Females    | 1.03   | 0.30 | 0.99   | 0.36 | 1.01 | 0.44 | 0.92   | 0.36 | 0.99 | 0.31 | n.s.    | ANOVA                                              |
| Nozue (24)                    | mg/day       | Males      | 1.59   | 1.0  | 1.54   | 0.8  | N/A  | N/A  | 1.59   | 0.9  | 1.57 | -    | -       | Paired t tests were conducted for each two seasons |
| Nozue (24)                    | mg/day       | Females    | 1.43   | 1.1  | 1.18   | 0.4  | N/A  | N/A  | 1.29   | 0.5  | 1.30 | -    | -       | Paired t tests were conducted for each two seasons |
| Amano (29)                    | mg/1000 kcal | Females    | 0.63   | 0.30 | 0.59   | 0.13 | 0.65 | 0.17 | 0.59   | 0.14 | 0.62 | -    | <0.05   | ANOVA                                              |
| Minari (31)                   | mg/day       | Females    | 1.13   | 0.16 | 1.14   | 0.11 | 0.92 | 0.11 | 1.43   | 0.42 | 1.16 | -    | <0.05   | Steel-Dwass's multiple comparison test             |
| <b>Niacin</b>                 |              |            |        |      |        |      |      |      |        |      |      |      |         |                                                    |
| Sasaki (2)                    | mg/day       | Males      | 22.5   | 4.5  | 22.7   | 5.1  | 21.6 | 4.6  | 22.2   | 5.0  | 22.3 | -    | 0.289   | Two-way ANOVA adjusted for area difference         |
| Sasaki (2)                    | mg/day       | Females    | 17.5   | 4.3  | 17.2   | 3.6  | 17.0 | 3.2  | 17.1   | 4.0  | 17.2 | -    | 0.729   | Two-way ANOVA adjusted for area difference         |
| Nozue (24)                    | mg/day       | Males      | 19.9   | 5.9  | 20.6   | 7.2  | N/A  | N/A  | 19.7   | 6.8  | 20.1 | -    | -       | Paired t tests were conducted for each two seasons |
| Nozue (24)                    | mg/day       | Females    | 15.8   | 5.1  | 15.8   | 5.3  | N/A  | N/A  | 16.1   | 5.2  | 15.9 | -    | -       | Paired t tests were conducted for each two seasons |
| Amano (29)                    | mg/1000 kcal | Females    | 8.2    | 2.3  | 8.0    | 2.7  | 8.0  | 2.4  | 8.4    | 2.2  | 8.2  | -    | n.s.    | ANOVA                                              |
| <b>Vitamin B<sub>6</sub></b>  |              |            |        |      |        |      |      |      |        |      |      |      |         |                                                    |
| Nozue (24)                    | mg/day       | Males      | 1.71   | 1.1  | 1.73   | 0.9  | N/A  | N/A  | 1.80   | 1.2  | 1.75 | -    | -       | Paired t tests were conducted for each two seasons |
| Nozue (24)                    | mg/day       | Females    | 1.48   | 1.2  | 1.30   | 0.3  | N/A  | N/A  | 1.43   | 0.7  | 1.40 | -    | -       | Paired t tests were conducted for each two seasons |
| Amano (29)                    | mg/1000 kcal | Females    | 0.60   | 0.10 | 0.60   | 0.10 | 0.60 | 0.10 | 0.60   | 0.10 | 0.60 | -    | n.s.    | ANOVA                                              |
| <b>Vitamin B<sub>12</sub></b> |              |            |        |      |        |      |      |      |        |      |      |      |         |                                                    |
| Nozue (24)                    | mg/day       | Males      | 11.8   | 7.7  | 9.7    | 7.3  | N/A  | N/A  | 10.6   | 7.0  | 10.7 | -    | -       | Paired t tests were conducted for each two seasons |
| Nozue (24)                    | mg/day       | Females    | 9.0    | 6.8  | 7.5    | 6.1  | N/A  | N/A  | 8.6    | 7.5  | 8.4  | -    | -       | Paired t tests were conducted for each two seasons |
| Amano (29)                    | μg/1000 kcal | Females    | 3.0    | 1.8  | 2.8    | 1.7  | 3.1  | 2.3  | 2.7    | 1.8  | 2.9  | -    | n.s.    | ANOVA                                              |
| <b>Folate</b>                 |              |            |        |      |        |      |      |      |        |      |      |      |         |                                                    |
| Nozue (24)                    | μg/day       | Males      | 378    | 118  | 380    | 124  | N/A  | N/A  | 412    | 137  | 390  | -    | -       | Paired t tests were conducted for each two seasons |
| Nozue (24)                    | μg/day       | Females    | 353    | 108  | 337    | 93   | N/A  | N/A  | 407    | 136  | 366  | -    | -       | Paired t tests were conducted for each two seasons |
| Amano (29)                    | μg/1000 kcal | Females    | 154    | 49   | 136    | 40   | 168  | 70   | 140    | 37   | 150  | -    | <0.01   | ANOVA                                              |
| Ishiwaki (30)                 | μg/day       | Males      | 444    | 155  | 430    | 252  | 420  | 172  | 427    | 166  | 430  | 135  | >0.05   | ANOVA                                              |
| Ishiwaki (30)                 | μg/day       | Females    | 408    | 136  | 406    | 335  | 406  | 160  | 403    | 144  | 406  | 141  | >0.05   | ANOVA                                              |

eTable 2. Cont.

|                         | Unit          | Population | Season |      |        |      |      |      |        |      |      |     | P-value | P-value detail                                     |
|-------------------------|---------------|------------|--------|------|--------|------|------|------|--------|------|------|-----|---------|----------------------------------------------------|
|                         |               |            | Spring |      | Summer |      | Fall |      | Winter |      | ALL  |     |         |                                                    |
|                         |               |            | mean   | SD   | mean   | SD   | mean | SD   | mean   | SD   | mean | SD  |         |                                                    |
| <b>Pantothenic acid</b> |               |            |        |      |        |      |      |      |        |      |      |     |         |                                                    |
| Nozue (24)              | mg/day        | Males      | 6.59   | 1.9  | 6.99   | 2.0  | N/A  | N/A  | 6.66   | 2.0  | 6.75 | -   | -       | Paired t tests were conducted for each two seasons |
| Nozue (24)              | mg/day        | Females    | 5.80   | 1.8  | 5.90   | 1.4  | N/A  | N/A  | 5.97   | 1.8  | 5.89 | -   | -       | Paired t tests were conducted for each two seasons |
| Amano (29)              | mg/1000 kcal  | Females    | 3.19   | 0.55 | 3.06   | 0.43 | 3.33 | 0.68 | 3.05   | 0.48 | 3.16 | -   | <0.01   | ANOVA                                              |
| <b>Vitamin C</b>        |               |            |        |      |        |      |      |      |        |      |      |     |         |                                                    |
| Sasaki (2)              | mg/day        | Males      | 113    | 41   | 127    | 76   | 154  | 60   | 130    | 41   | 131  | -   | <0.001  | Two-way ANOVA adjusted for area difference         |
| Sasaki (2)              | mg/day        | Females    | 120    | 48   | 131    | 57   | 163  | 63   | 145    | 51   | 140  | -   | <0.001  | Two-way ANOVA adjusted for area difference         |
| Tokudome (3)            | mg/day        | Females    | 136    | 72   | 128    | 78   | 160  | 82   | 154    | 74   | 145  | -   | <0.001  | ANOVA                                              |
| Owaki (4)               | mg/day        | Males      | 74     | 43   | 56     | 31   | 48   | 31   | 57     | 35   | 59   | 30  | <0.01   | ANOVA                                              |
| Owaki (4)               | mg/day        | Females    | 80     | 37   | 58     | 32   | 53   | 29   | 59     | 29   | 63   | 30  | <0.01   | ANOVA                                              |
| Nozue (24)              | mg/day        | Males      | 304    | 637  | 102    | 36   | N/A  | N/A  | 292    | 559  | 233  | -   | -       | Paired t tests were conducted for each two seasons |
| Nozue (24)              | mg/day        | Females    | 561    | 1873 | 105    | 35   | N/A  | N/A  | 585    | 2176 | 417  | -   | -       | Paired t tests were conducted for each two seasons |
| Amano (29)              | mg/1000 kcal  | Females    | 46     | 21   | 39     | 20   | 48   | 23   | 36     | 17   | 42   | -   | <0.05   | ANOVA                                              |
| Ishiwaki (30)           | mg/day        | Males      | 120    | 53   | 124    | 84   | 145  | 81   | 125    | 61   | 128  | 49  | <0.001  | ANOVA                                              |
| Ishiwaki (30)           | mg/day        | Females    | 132    | 77   | 123    | 85   | 158  | 84   | 137    | 77   | 138  | 58  | <0.001  |                                                    |
| Minari (31)             | mg/day        | Females    | 98     | 18   | 90     | 8    | 99   | 8    | 145    | 54   | 108  | -   | <0.05   | Steel-Dwass's multiple comparison test             |
| <b>Sodium and Salt</b>  |               |            |        |      |        |      |      |      |        |      |      |     |         |                                                    |
| Sasaki (2)              | mg/day        | Males      | 5607   | 1264 | 5881   | 1357 | 5813 | 1231 | 5851   | 1472 | 5788 | -   | 0.139   | Two-way ANOVA adjusted for area difference         |
| Sasaki (2)              | mg/day        | Females    | 4779   | 1147 | 5103   | 1091 | 5033 | 1168 | 5226   | 1299 | 5035 | -   | 0.003   | Two-way ANOVA adjusted for area difference         |
| Owaki (4)               | salt eq g/day | Males      | 13.7   | 4.2  | 15.1   | 4.8  | 12.8 | 3.5  | 13.6   | 3.5  | 13.8 | 3.2 | <0.05   | ANOVA                                              |
| Owaki (4)               | salt eq g/day | Females    | 13.2   | 4.4  | 13.5   | 3.7  | 12.8 | 3.2  | 12     | 3.4  | 12.9 | 3.3 | <0.05   | ANOVA                                              |
| Nozue (24)              | salt eq g/day | Males      | 14.2   | 4.7  | 14.9   | 6.6  | N/A  | N/A  | 15.0   | 4.2  | 14.7 | -   | -       | Paired t tests were conducted for each two seasons |
| Nozue (24)              | salt eq g/day | Females    | 12.2   | 3.2  | 12.5   | 3.5  | N/A  | N/A  | 13.4   | 3.5  | 12.7 | -   | -       | Paired t tests were conducted for each two seasons |
| Amano (29)              | mg/1000 kcal  | Females    | 1943   | 430  | 2006   | 405  | 1907 | 495  | 1910   | 419  | 1942 | -   | n.s.    | ANOVA                                              |
| Ishiwaki (30)           | salt eq g/day | Males      | 14.5   | 4.6  | 14.5   | 4.4  | 13.9 | 4.2  | 13.6   | 3.9  | 14.1 | 3.3 | <0.01   | ANOVA                                              |
| Ishiwaki (30)           | salt eq g/day | Females    | 12.3   | 3.8  | 12.4   | 4.3  | 12.1 | 3.7  | 11.8   | 3.4  | 12.2 | 3.0 | <0.05   | ANOVA                                              |
| Minari (31)             | salt eq g/day | Females    | 11.4   | 2.6  | 9.1    | 1.1  | 8.7  | 0.5  | 10.9   | 2.1  | 10.0 | -   | <0.05   | Steel-Dwass's multiple comparison test             |
| <b>Potassium</b>        |               |            |        |      |        |      |      |      |        |      |      |     |         |                                                    |
| Sasaki (2)              | mg/day        | Males      | 3281   | 657  | 3406   | 787  | 3343 | 718  | 3380   | 712  | 3353 | -   | 0.271   | Two-way ANOVA adjusted for area difference         |
| Sasaki (2)              | mg/day        | Females    | 2967   | 651  | 3114   | 696  | 3032 | 645  | 3119   | 772  | 3058 | -   | 0.05    | Two-way ANOVA adjusted for area difference         |
| Tokudome (3)            | mg/day        | Females    | 2810   | 795  | 2817   | 775  | 3056 | 763  | 2969   | 780  | 2913 | -   | <0.001  | ANOVA                                              |
| Owaki (4)               | mg/day        | Males      | 3081   | 836  | 3234   | 983  | 2866 | 968  | 2775   | 713  | 2989 | 647 | <0.01   | ANOVA                                              |
| Owaki (4)               | mg/day        | Females    | 3053   | 834  | 3067   | 921  | 2761 | 795  | 2743   | 786  | 2906 | 717 | <0.01   | ANOVA                                              |
| Nozue (24)              | mg/day        | Males      | 2846   | 725  | 3044   | 826  | N/A  | N/A  | 2985   | 777  | 2958 | -   | -       | Paired t tests were conducted for each two seasons |
| Nozue (24)              | mg/day        | Females    | 2667   | 812  | 2825   | 703  | N/A  | N/A  | 2865   | 723  | 2786 | -   | -       | Paired t tests were conducted for each two seasons |
| Amano (29)              | mg/1000 kcal  | Females    | 1168   | 251  | 1135   | 272  | 1246 | 286  | 1138   | 222  | 1172 | -   | <0.05   | ANOVA                                              |

**eTable 2. Cont.**

|                   | Unit         | Population | Season |     |        |     |      |     |        |     |      |     | P-value | P-value detail                                     |
|-------------------|--------------|------------|--------|-----|--------|-----|------|-----|--------|-----|------|-----|---------|----------------------------------------------------|
|                   |              |            | Spring |     | Summer |     | Fall |     | Winter |     | ALL  |     |         |                                                    |
|                   |              |            | mean   | SD  | mean   | SD  | mean | SD  | mean   | SD  | mean | SD  |         |                                                    |
| <b>Calcium</b>    |              |            |        |     |        |     |      |     |        |     |      |     |         |                                                    |
| Sasaki (2)        | mg/day       | Males      | 646    | 174 | 667    | 215 | 691  | 209 | 692    | 209 | 674  | -   | 0.093   | Two-way ANOVA adjusted for area difference         |
| Sasaki (2)        | mg/day       | Females    | 616    | 159 | 623    | 174 | 632  | 181 | 662    | 179 | 633  | -   | 0.041   | Two-way ANOVA adjusted for area difference         |
| Tokudome (3)      | mg/day       | Females    | 602    | 239 | 623    | 245 | 662  | 250 | 642    | 257 | 632  | -   | <0.001  | ANOVA                                              |
| Owaki (4)         | mg/day       | Males      | 599    | 245 | 607    | 282 | 583  | 342 | 532    | 221 | 580  | 205 | n.s.    | ANOVA                                              |
| Owaki (4)         | mg/day       | Females    | 640    | 252 | 601    | 271 | 585  | 270 | 594    | 255 | 605  | 224 | n.s.    | ANOVA                                              |
| Nozue (24)        | mg/day       | Males      | 667    | 308 | 593    | 256 | N/A  | N/A | 640    | 297 | 633  | -   | -       | Paired t tests were conducted for each two seasons |
| Nozue (24)        | mg/day       | Females    | 704    | 564 | 556    | 188 | N/A  | N/A | 688    | 479 | 649  | -   | -       | Paired t tests were conducted for each two seasons |
| Amano (29)        | mg/1000 kcal | Females    | 256    | 87  | 252    | 93  | 279  | 114 | 228    | 78  | 254  | -   | <0.01   | ANOVA                                              |
| Ishiwaki (30)     | mg/day       | Males      | 661    | 239 | 634    | 231 | 643  | 223 | 654    | 218 | 648  | 189 | >0.05   | ANOVA                                              |
| Ishiwaki (30)     | mg/day       | Females    | 646    | 236 | 616    | 231 | 634  | 224 | 360    | 230 | 631  | 188 | >0.05   | ANOVA                                              |
| Minari (31)       | mg/day       | Females    | 474    | 76  | 459    | 58  | 448  | 44  | 602    | 178 | 496  | -   | <0.05   | Steel-Dwass's multiple comparison test             |
| <b>Magnesium</b>  |              |            |        |     |        |     |      |     |        |     |      |     |         |                                                    |
| Tokudome (3)      | mg/day       | Females    | 248    | 74  | 249    | 73  | 264  | 72  | 258    | 73  | 255  | -   | <0.001  | ANOVA                                              |
| Owaki (4)         | mg/day       | Males      | 251    | 67  | 260    | 81  | 246  | 64  | 225    | 67  | 246  | 61  | <0.05   | ANOVA                                              |
| Owaki (4)         | mg/day       | Females    | 220    | 68  | 219    | 69  | 204  | 61  | 198    | 58  | 210  | 57  | <0.05   | ANOVA                                              |
| Nozue (24)        | mg/day       | Males      | 329    | 79  | 342    | 96  | N/A  | N/A | 315    | 69  | 329  | -   | -       | Paired t tests were conducted for each two seasons |
| Nozue (24)        | mg/day       | Females    | 299    | 84  | 304    | 70  | N/A  | N/A | 289    | 69  | 297  | -   | -       | Paired t tests were conducted for each two seasons |
| Amano (29)        | mg/1000 kcal | Females    | 120    | 25  | 120    | 29  | 126  | 35  | 119    | 28  | 121  | -   | n.s.    | ANOVA                                              |
| <b>Phosphorus</b> |              |            |        |     |        |     |      |     |        |     |      |     |         |                                                    |
| Sasaki (2)        | mg/day       | Males      | 1486   | 261 | 1509   | 301 | 1506 | 283 | 1491   | 283 | 1498 | -   | 0.749   | Two-way ANOVA adjusted for area difference         |
| Sasaki (2)        | mg/day       | Females    | 1230   | 225 | 1220   | 218 | 1214 | 212 | 1228   | 238 | 1223 | -   | 0.882   | Two-way ANOVA adjusted for area difference         |
| Tokudome (3)      | mg/day       | Females    | 1063   | 262 | 1070   | 274 | 1096 | 237 | 1077   | 262 | 1077 | -   | n.s.    | ANOVA                                              |
| Owaki (4)         | mg/day       | Males      | 1308   | 385 | 1319   | 425 | 1250 | 389 | 1218   | 299 | 1274 | 256 | n.s.    | ANOVA                                              |
| Owaki (4)         | mg/day       | Females    | 1150   | 276 | 1139   | 309 | 1076 | 287 | 1092   | 301 | 1114 | 257 | n.s.    | ANOVA                                              |
| Nozue (24)        | mg/day       | Males      | 1277   | 332 | 1234   | 307 | N/A  | N/A | 1215   | 282 | 1242 | -   | -       | Paired t tests were conducted for each two seasons |
| Nozue (24)        | mg/day       | Females    | 1096   | 283 | 1044   | 249 | N/A  | N/A | 1049   | 252 | 1063 | -   | -       | Paired t tests were conducted for each two seasons |
| Amano (29)        | mg/1000 kcal | Females    | 538    | 79  | 535    | 86  | 549  | 100 | 512    | 77  | 533  | -   | <0.05   | ANOVA                                              |



**eTable 2. Cont.**

|               | Unit         | Population | Season |     |        |     |      |     |        |     | ALL  |     | P-value | P-value detail                                     |
|---------------|--------------|------------|--------|-----|--------|-----|------|-----|--------|-----|------|-----|---------|----------------------------------------------------|
|               |              |            | Spring |     | Summer |     | Fall |     | Winter |     | mean | SD  |         |                                                    |
|               |              |            | mean   | SD  | mean   | SD  | mean | SD  | mean   | SD  |      |     |         |                                                    |
| <b>Iron</b>   |              |            |        |     |        |     |      |     |        |     |      |     |         |                                                    |
| Sasaki (2)    | mg/day       | Males      | 13.2   | 2.7 | 13.0   | 3.1 | 13.3 | 2.9 | 14.0   | 3.2 | 13.4 | -   | 0.004   | Two-way ANOVA adjusted for area difference         |
| Sasaki (2)    | mg/day       | Females    | 11.6   | 2.6 | 11.3   | 2.3 | 11.6 | 2.4 | 12.6   | 2.9 | 11.8 | -   | <0.001  | Two-way ANOVA adjusted for area difference         |
| Tokudome (3)  | mg/day       | Females    | 10.6   | 3.2 | 10.1   | 2.9 | 11.4 | 3.3 | 11.2   | 3.2 | 10.8 | -   | <0.001  | ANOVA                                              |
| Owaki (4)     | mg/day       | Males      | 12.7   | 3.1 | 12.8   | 3.5 | 11.7 | 3.8 | 11.7   | 3.8 | 12.2 | 2.5 | <0.05   | ANOVA                                              |
| Owaki (4)     | mg/day       | Females    | 12.3   | 3.9 | 11.8   | 3.6 | 11.3 | 3.4 | 11.3   | 4.1 | 11.7 | 2.9 | n.s.    | ANOVA                                              |
| Nozue (24)    | mg/day       | Males      | 10.2   | 2.7 | 9.8    | 2.7 | N/A  | N/A | 10.0   | 2.4 | 10.0 | -   | -       | Paired t tests were conducted for each two seasons |
| Nozue (24)    | mg/day       | Females    | 9.6    | 2.9 | 9.0    | 2.1 | N/A  | N/A | 9.6    | 2.6 | 9.4  | -   | -       | Paired t tests were conducted for each two seasons |
| Amano (29)    | mg/1000 kcal | Females    | 4.0    | 0.8 | 4.0    | 0.9 | 4.1  | 1.0 | 4.0    | 1.0 | 4.0  | -   | n.s.    | ANOVA                                              |
| Ishiwaki (30) | mg/day       | Males      | 10.7   | 3.1 | 10.2   | 4.0 | 10.1 | 2.9 | 10.4   | 2.9 | 10.4 | 2.5 | >0.05   | ANOVA                                              |
| Ishiwaki (30) | mg/day       | Females    | 9.6    | 2.8 | 9.5    | 5.3 | 9.5  | 3.0 | 9.7    | 3.3 | 9.6  | 2.8 | >0.05   | ANOVA                                              |
| Minari (31)   | mg/day       | Females    | 8.8    | 1.0 | 8.2    | 1.1 | 8.3  | 0.1 | 10.2   | 2.6 | 8.9  | -   | <0.05   | Steel-Dwass's multiple comparison test             |
| <b>Zinc</b>   |              |            |        |     |        |     |      |     |        |     |      |     |         |                                                    |
| Tokudome (3)  | mg/day       | Females    | 7.8    | 2.1 | 7.8    | 2.2 | 8.7  | 5.1 | 9.5    | 7.5 | 8.5  | -   | <0.001  | ANOVA                                              |
| Owaki (4)     | mg/day       | Males      | 7.5    | 2.5 | 7.7    | 2.8 | 7.3  | 2.0 | 6.8    | 2.1 | 7.3  | 2.1 | n.s.    | ANOVA                                              |
| Owaki (4)     | mg/day       | Females    | 6.3    | 1.6 | 6.2    | 1.8 | 6.2  | 2.1 | 5.8    | 1.7 | 6.1  | 1.6 | n.s.    | ANOVA                                              |
| Nozue (24)    | mg/day       | Males      | 10.4   | 2.4 | 10.0   | 2.4 | N/A  | N/A | 10.1   | 2.2 | 10.2 | -   | -       | Paired t tests were conducted for each two seasons |
| Nozue (24)    | mg/day       | Females    | 8.9    | 2.4 | 8.4    | 1.7 | N/A  | N/A | 8.7    | 2.5 | 8.7  | -   | -       | Paired t tests were conducted for each two seasons |
| Amano (29)    | mg/1000 kcal | Females    | 4.5    | 0.6 | 4.4    | 0.7 | 4.4  | 0.7 | 4.4    | 0.8 | 4.4  | -   | n.s.    | ANOVA                                              |
| <b>Copper</b> |              |            |        |     |        |     |      |     |        |     |      |     |         |                                                    |
| Tokudome (3)  | mg/day       | Females    | 1.2    | 0.4 | 1.1    | 0.3 | 1.3  | 0.6 | 1.3    | 0.7 | 1.2  | -   | <0.001  | ANOVA                                              |
| Owaki (4)     | mg/day       | Males      | 1.1    | 0.4 | 1.2    | 0.5 | 1.2  | 0.7 | 1.1    | 0.5 | 1.2  | 0.4 | n.s.    | ANOVA                                              |
| Owaki (4)     | mg/day       | Females    | 0.9    | 0.3 | 1.0    | 0.4 | 1.0  | 0.7 | 1.0    | 0.6 | 1.0  | 0.4 | n.s.    | ANOVA                                              |
| Nozue (24)    | mg/day       | Males      | 1.6    | 0.4 | 1.6    | 0.4 | N/A  | N/A | 1.6    | 0.4 | 1.6  | -   | -       | Paired t tests were conducted for each two seasons |
| Nozue (24)    | mg/day       | Females    | 1.4    | 0.4 | 1.4    | 0.3 | N/A  | N/A | 1.4    | 0.3 | 1.4  | -   | -       | Paired t tests were conducted for each two seasons |
| Amano (29)    | mg/1000 kcal | Females    | 0.6    | 0.1 | 0.6    | 0.2 | 0.6  | 0.1 | 0.6    | 0.2 | 0.6  | -   | n.s.    | ANOVA                                              |

SD, Standard deviation. N/A, Not assessed. "-" means the SD was not calculated in the study. n.s. means there were no significant differences in intakes between seasons.

**eTable 3.** Mean intake of food groups in each season

|                             | Unit        | Population            | Season |      |        |      |      |      |        |      |      |    | P-value | P-value detail                                                                                   |
|-----------------------------|-------------|-----------------------|--------|------|--------|------|------|------|--------|------|------|----|---------|--------------------------------------------------------------------------------------------------|
|                             |             |                       | Spring |      | Summer |      | Fall |      | Winter |      | ALL  |    |         |                                                                                                  |
|                             |             |                       | mean   | SD   | mean   | SD   | mean | SD   | mean   | SD   | mean | SD |         |                                                                                                  |
| <b>Grains</b>               |             |                       |        |      |        |      |      |      |        |      |      |    |         |                                                                                                  |
| Sasaki (2)                  | g/day       | Males                 | 331    | 97   | 332    | 113  | 338  | 94   | 324    | 92   | 331  | -  | 0.469   | Two-way ANOVA adjusted for area difference                                                       |
| Sasaki (2)                  | g/day       | Females               | 234    | 59   | 228    | 66   | 233  | 66   | 220    | 50   | 229  | -  | 0.157   | Two-way ANOVA adjusted for area difference                                                       |
| Nozue (24)                  | g/day       | Males                 | 606    | 182  | 592    | 147  | N/A  | N/A  | 569    | 124  | 589  | -  | -       | Paired t test                                                                                    |
| Nozue (24)                  | g/day       | Females               | 441    | 114  | 441    | 86   | N/A  | N/A  | 431    | 90   | 438  | -  | -       | Paired t test                                                                                    |
| Miyai (25)                  | g/1000 kcal | Normal weight Females | 232    | 82   | 236    | 56   | 202  | 74   | 232    | 72   | 223  | 54 | 0.104   | Paired friedman test                                                                             |
| Miyai (25)                  | g/1000 kcal | Overweight Females    | 288    | 51   | 286    | 32   | 257  | 61   | 272    | 26   | 273  | 22 | 0.615   | Paired friedman test                                                                             |
| <b>Potatoes</b>             |             |                       |        |      |        |      |      |      |        |      |      |    |         |                                                                                                  |
| Sasaki (2)                  | g/day       | Males                 | 37.0   | 27.0 | 39.0   | 29.0 | 63.0 | 35.0 | 55.0   | 34.0 | 48.5 | -  | <0.001  | Two-way ANOVA adjusted for area difference                                                       |
| Sasaki (2)                  | g/day       | Females               | 36.0   | 25.0 | 39.0   | 24.0 | 61.0 | 37.0 | 55.0   | 32.0 | 47.8 | -  | <0.001  | Two-way ANOVA adjusted for area difference                                                       |
| Nozue (24)                  | g/day       | Males                 | 78.8   | 46.8 | 69.9   | 55.0 | N/A  | N/A  | 85.3   | 58.0 | 78.0 | -  | -       | Paired t test                                                                                    |
| Nozue (24)                  | g/day       | Females               | 73.5   | 47.6 | 48.7   | 43.0 | N/A  | N/A  | 88.1   | 48.7 | 70.1 | -  | -       | Paired t test                                                                                    |
| Tatsumi (26)                | g/day       | Males and Females     | 31.2   | 23.9 | 28.2   | 23.4 | 40.7 | 22.5 | 39.4   | 22.5 | 34.9 | -  | <0.001  | A general linear model for repeated measures was used to estimate area-adjusted means and 95% CI |
| <b>Sugar and sweeteners</b> |             |                       |        |      |        |      |      |      |        |      |      |    |         |                                                                                                  |
| Sasaki (2)                  | g/day       | Males                 | 8.0    | 6.0  | 8.0    | 7.0  | 8.0  | 7.0  | 10.0   | 8.0  | 8.5  | -  | 0.158   | Two-way ANOVA adjusted for area difference                                                       |
| Sasaki (2)                  | g/day       | Females               | 9.0    | 7.0  | 8.0    | 6.0  | 8.0  | 5.0  | 9.0    | 7.0  | 8.5  | -  | 0.102   | Two-way ANOVA adjusted for area difference                                                       |
| Nozue (24)                  | g/day       | Males                 | 9.5    | 6.3  | 9.9    | 9.4  | N/A  | N/A  | 7.6    | 4.4  | 9.0  | -  | -       | Paired t test                                                                                    |
| Nozue (24)                  | g/day       | Females               | 8.9    | 6.6  | 8.6    | 7.9  | N/A  | N/A  | 7.4    | 4.5  | 8.3  | -  | -       | Paired t test                                                                                    |
| <b>Beans</b>                |             |                       |        |      |        |      |      |      |        |      |      |    |         |                                                                                                  |
| Sasaki (2)                  | g/day       | Males                 | 94.0   | 47.0 | 85.0   | 39.0 | 91.0 | 44.0 | 94.0   | 44.0 | 91.0 | -  | 0.306   | Two-way ANOVA adjusted for area difference                                                       |
| Sasaki (2)                  | g/day       | Females               | 82.0   | 38.0 | 73.0   | 33.0 | 80.0 | 33.0 | 85.0   | 38.0 | 80.0 | -  | 0.028   | Two-way ANOVA adjusted for area difference                                                       |
| Nozue (24)                  | g/day       | Males                 | 71.3   | 50.5 | 71.9   | 54.8 | N/A  | N/A  | 64.0   | 45.8 | 69.1 | -  | -       | Paired t test                                                                                    |
| Nozue (24)                  | g/day       | Females               | 84.1   | 62.2 | 82.5   | 57.7 | N/A  | N/A  | 71.3   | 53.9 | 79.3 | -  | -       | Paired t test                                                                                    |
| Tatsumi (26)                | g/day       | Males and Females     | 65.0   | 28.1 | 63.8   | 29.1 | 63.9 | 28.1 | 73.1   | 29.1 | 66.5 | -  | <0.001  | A general linear model for repeated measures was used to estimate area-adjusted means and 95% CI |
| <b>Nuts and seeds</b>       |             |                       |        |      |        |      |      |      |        |      |      |    |         |                                                                                                  |
| Sasaki (2)                  | g/day       | Males                 | 2.0    | 3.0  | 2.0    | 3.0  | 4.0  | 9.0  | 3.0    | 6.0  | 2.8  | -  | 0.053   | Two-way ANOVA adjusted for area difference                                                       |
| Sasaki (2)                  | g/day       | Females               | 2.0    | 4.0  | 2.0    | 2.0  | 6.0  | 18.0 | 3.0    | 5.0  | 3.3  | -  | 0.069   | Two-way ANOVA adjusted for area difference                                                       |
| Nozue (24)                  | g/day       | Males                 | 2.1    | 3.0  | 2.4    | 8.3  | N/A  | N/A  | 1.5    | 3.2  | 2.0  | -  | -       | Paired t test                                                                                    |
| Nozue (24)                  | g/day       | Females               | 2.6    | 3.4  | 2.4    | 4.3  | N/A  | N/A  | 1.9    | 3.2  | 2.3  | -  | -       | Paired t test                                                                                    |
| <b>Vegetables</b>           |             |                       |        |      |        |      |      |      |        |      |      |    |         |                                                                                                  |
| Sasaki (2)                  | g/day       | Males                 | 310    | 92   | 388    | 157  | 299  | 98   | 302    | 97   | 325  | -  | <0.001  | Two-way ANOVA adjusted for area difference                                                       |
| Sasaki (2)                  | g/day       | Females               | 298    | 94   | 391    | 134  | 278  | 98   | 294    | 110  | 315  | -  | <0.001  | Two-way ANOVA adjusted for area difference                                                       |
| Nozue (24)                  | g/day       | Males                 | 316    | 103  | 463    | 182  | N/A  | N/A  | 386    | 125  | 388  | -  | -       | Paired t test                                                                                    |
| Nozue (24)                  | g/day       | Females               | 290    | 99   | 457    | 154  | N/A  | N/A  | 378    | 121  | 375  | -  | -       | Paired t test                                                                                    |
| Tatsumi (26)                | g/day       | Males and Females     | 253    | 72   | 272    | 71   | 239  | 72   | 270    | 71   | 259  | -  | <0.001  | A general linear model for repeated measures was used to estimate area-adjusted means and 95% CI |

**eTable 3. Cont.**

|                           | Unit  | Population        | Season |      |        |      |      |      |        |      |      |    | P-value | P-value detail                                                                                   |
|---------------------------|-------|-------------------|--------|------|--------|------|------|------|--------|------|------|----|---------|--------------------------------------------------------------------------------------------------|
|                           |       |                   | Spring |      | Summer |      | Fall |      | Winter |      | ALL  |    |         |                                                                                                  |
|                           |       |                   | mean   | SD   | mean   | SD   | mean | SD   | mean   | SD   | mean | SD |         |                                                                                                  |
| <b>Fruits</b>             |       |                   |        |      |        |      |      |      |        |      |      |    |         |                                                                                                  |
| Sasaki (2)                | g/day | Males             | 109    | 95   | 166    | 146  | 167  | 129  | 119    | 84   | 140  | -  | <0.001  | Two-way ANOVA adjusted for area difference                                                       |
| Sasaki (2)                | g/day | Females           | 141    | 96   | 193    | 133  | 209  | 100  | 160    | 93   | 176  | -  | <0.001  | Two-way ANOVA adjusted for area difference                                                       |
| Nozue (24)                | g/day | Males             | 91     | 83   | 125    | 158  | N/A  | N/A  | 142    | 177  | 120  | -  | -       | Paired t test                                                                                    |
| Nozue (24)                | g/day | Females           | 121    | 106  | 206    | 154  | N/A  | N/A  | 199    | 182  | 175  | -  | -       | Paired t test                                                                                    |
| Tatsumi (26)              | g/day | Males and Females | 110    | 66   | 147    | 65   | 166  | 66   | 116    | 65   | 135  | -  | <0.001  | A general linear model for repeated measures was used to estimate area-adjusted means and 95% CI |
| <b>Mushrooms</b>          |       |                   |        |      |        |      |      |      |        |      |      |    |         |                                                                                                  |
| Sasaki (2)                | g/day | Males             | 6.0    | 7.0  | 8.0    | 10.0 | 12.0 | 12.0 | 12.0   | 10.0 | 9.5  | -  | <0.001  | Two-way ANOVA adjusted for area difference                                                       |
| Sasaki (2)                | g/day | Females           | 6.0    | 6.0  | 8.0    | 8.0  | 13.0 | 12.0 | 10.0   | 9.0  | 9.3  | -  | <0.001  | Two-way ANOVA adjusted for area difference                                                       |
| Nozue (24)                | g/day | Males             | 22.0   | 19.7 | 12.6   | 13.4 | N/A  | N/A  | 20.2   | 16.2 | 18.3 | -  | -       | Paired t test                                                                                    |
| Nozue (24)                | g/day | Females           | 19.9   | 18.8 | 11.2   | 11.5 | N/A  | N/A  | 17.8   | 14.4 | 16.3 | -  | -       | Paired t test                                                                                    |
| <b>Seaweeds</b>           |       |                   |        |      |        |      |      |      |        |      |      |    |         |                                                                                                  |
| Sasaki (2)                | g/day | Males             | 8.0    | 8.0  | 11.0   | 17.0 | 6.0  | 8.0  | 6.0    | 5.0  | 7.8  | -  | 0.031   | Two-way ANOVA adjusted for area difference                                                       |
| Sasaki (2)                | g/day | Females           | 8.0    | 11.0 | 10.0   | 16.0 | 6.0  | 7.0  | 6.0    | 5.0  | 7.5  | -  | 0.069   | Two-way ANOVA adjusted for area difference                                                       |
| Nozue (24)                | g/day | Males             | 18.3   | 20.3 | 21.8   | 23.1 | N/A  | N/A  | 11.2   | 12.6 | 17.1 | -  | -       | Paired t test                                                                                    |
| Nozue (24)                | g/day | Females           | 14.9   | 16.8 | 24.1   | 24.4 | N/A  | N/A  | 11.5   | 15.9 | 16.8 | -  | -       | Paired t test                                                                                    |
| <b>Fish and shellfish</b> |       |                   |        |      |        |      |      |      |        |      |      |    |         |                                                                                                  |
| Sasaki (2)                | g/day | Males             | 143    | 52   | 143    | 50   | 154  | 48   | 151    | 59   | 148  | -  | 0.190   | Two-way ANOVA adjusted for area difference                                                       |
| Sasaki (2)                | g/day | Females           | 111    | 41   | 113    | 40   | 123  | 41   | 116    | 41   | 116  | -  | 0.068   | Two-way ANOVA adjusted for area difference                                                       |
| Nozue (24)                | g/day | Males             | 154    | 68   | 124    | 74   | N/A  | N/A  | 129    | 59   | 135  | -  | -       | Paired t test                                                                                    |
| Nozue (24)                | g/day | Females           | 112    | 58   | 93     | 56   | N/A  | N/A  | 109    | 55   | 105  | -  | -       | Paired t test                                                                                    |
| <b>Meats</b>              |       |                   |        |      |        |      |      |      |        |      |      |    |         |                                                                                                  |
| Sasaki (2)                | g/day | Males             | 62.0   | 27.0 | 67.0   | 33.0 | 66.0 | 31.0 | 66.0   | 36.0 | 65.3 | -  | 0.503   | Two-way ANOVA adjusted for area difference                                                       |
| Sasaki (2)                | g/day | Females           | 52.0   | 22.0 | 52.0   | 24.0 | 50.0 | 21.0 | 52.0   | 32.0 | 51.5 | -  | 0.780   | Two-way ANOVA adjusted for area difference                                                       |
| Nozue (24)                | g/day | Males             | 65.3   | 42.0 | 80.9   | 56.0 | N/A  | N/A  | 80.7   | 55.3 | 75.6 | -  | -       | Paired t test                                                                                    |
| Nozue (24)                | g/day | Females           | 56.7   | 58.8 | 57.2   | 40.0 | N/A  | N/A  | 56.8   | 43.0 | 56.9 | -  | -       | Paired t test                                                                                    |
| <b>Eggs</b>               |       |                   |        |      |        |      |      |      |        |      |      |    |         |                                                                                                  |
| Sasaki (2)                | g/day | Males             | 41.0   | 19.0 | 42.0   | 19.0 | 42.0 | 19.0 | 40.0   | 16.0 | 41.3 | -  | 0.819   | Two-way ANOVA adjusted for area difference                                                       |
| Sasaki (2)                | g/day | Females           | 35.0   | 17.0 | 35.0   | 20.0 | 36.0 | 17.0 | 33.0   | 15.0 | 34.8 | -  | 0.659   | Two-way ANOVA adjusted for area difference                                                       |
| Nozue (24)                | g/day | Males             | 42.6   | 36.7 | 36.5   | 27.9 | N/A  | N/A  | 39.8   | 27.5 | 39.6 | -  | -       | Paired t test                                                                                    |
| Nozue (24)                | g/day | Females           | 39.1   | 28.7 | 36.4   | 26.1 | N/A  | N/A  | 33.8   | 22.5 | 36.4 | -  | -       | Paired t test                                                                                    |
| <b>Dairy</b>              |       |                   |        |      |        |      |      |      |        |      |      |    |         |                                                                                                  |
| Sasaki (2)                | g/day | Males             | 141    | 125  | 156    | 145  | 134  | 133  | 131    | 106  | 141  | -  | 0.114   | Two-way ANOVA adjusted for area difference                                                       |
| Sasaki (2)                | g/day | Females           | 166    | 102  | 178    | 110  | 140  | 104  | 140    | 93   | 156  | -  | <0.001  | Two-way ANOVA adjusted for area difference                                                       |
| Nozue (24)                | g/day | Males             | 98     | 159  | 121    | 175  | N/A  | N/A  | 105    | 158  | 108  | -  | -       | Paired t test                                                                                    |
| Nozue (24)                | g/day | Females           | 104    | 137  | 120    | 114  | N/A  | N/A  | 90     | 99   | 104  | -  | -       | Paired t test                                                                                    |

**eTable 3. Cont.**

|                              | Unit        | Population            | Season |      |        |      |      |      |        |      | P-value | P-value detail |       |                                            |
|------------------------------|-------------|-----------------------|--------|------|--------|------|------|------|--------|------|---------|----------------|-------|--------------------------------------------|
|                              |             |                       | Spring |      | Summer |      | Fall |      | Winter |      |         |                | ALL   |                                            |
|                              |             |                       | mean   | SD   | mean   | SD   | mean | SD   | mean   | SD   |         |                | mean  | SD                                         |
| <b>Fats and oils</b>         |             |                       |        |      |        |      |      |      |        |      |         |                |       |                                            |
| Sasaki (2)                   | g/day       | Males                 | 10.0   | 5.0  | 11.0   | 4.0  | 9.0  | 5.0  | 9.0    | 4.0  | 9.8     | -              | 0.007 | Two-way ANOVA adjusted for area difference |
| Sasaki (2)                   | g/day       | Females               | 8.0    | 4.0  | 10.0   | 5.0  | 8.0  | 4.0  | 8.0    | 4.0  | 8.5     | -              | 0.002 | Two-way ANOVA adjusted for area difference |
| Nozue (24)                   | g/day       | Males                 | 11.7   | 7.5  | 14.3   | 9.3  | N/A  | N/A  | 9.5    | 6.9  | 11.8    | -              | -     | Paired t test                              |
| Nozue (24)                   | g/day       | Females               | 8.4    | 6.0  | 9.1    | 6.7  | N/A  | N/A  | 7.5    | 5.7  | 8.3     | -              | -     | Paired t test                              |
| Miyai (25)                   | g/1000 kcal | Normal weight Females | 5.2    | 3.2  | 8.4    | 5.6  | 8.2  | 4.4  | 6.6    | 3.8  | 7.0     | 2.7            | 0.065 | Paired friedman test                       |
| Miyai (25)                   | g/1000 kcal | Overweight Females    | 6.5    | 2.8  | 6.8    | 3.9  | 6.7  | 3.1  | 5.6    | 2.3  | 6.4     | 1.0            | 0.978 | Paired friedman test                       |
| <b>Seasonings and spices</b> |             |                       |        |      |        |      |      |      |        |      |         |                |       |                                            |
| Sasaki (2)                   | g/day       | Males                 | 40.0   | 13.0 | 39.0   | 13.0 | 39.0 | 11.0 | 40.0   | 13.0 | 39.5    | -              | 0.563 | Two-way ANOVA adjusted for area difference |
| Sasaki (2)                   | g/day       | Females               | 37.0   | 13.0 | 36.0   | 12.0 | 35.0 | 10.0 | 36.0   | 12.0 | 36.0    | -              | 0.401 | Two-way ANOVA adjusted for area difference |
| Nozue (24)                   | g/day       | Males                 | 119.8  | 73.9 | 114.8  | 64.2 | N/A  | N/A  | 128.8  | 80.6 | 121.1   | -              | -     | Paired t test                              |
| Nozue (24)                   | g/day       | Females               | 87.1   | 40.1 | 92.3   | 43.0 | N/A  | N/A  | 98.4   | 51.3 | 92.6    | -              | -     | Paired t test                              |

SD, Standard deviation. N/A, Not assessed. "-" means the SD was not calculated in the study. SDs for potatoes, vegetables, and fruits in Tatsumi (26) were estimated from the 95% confidence intervals.

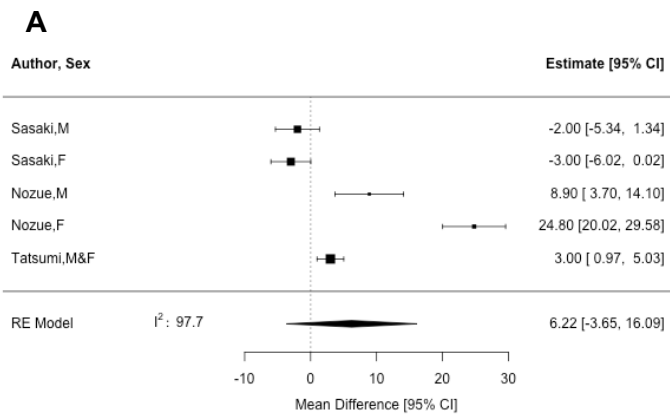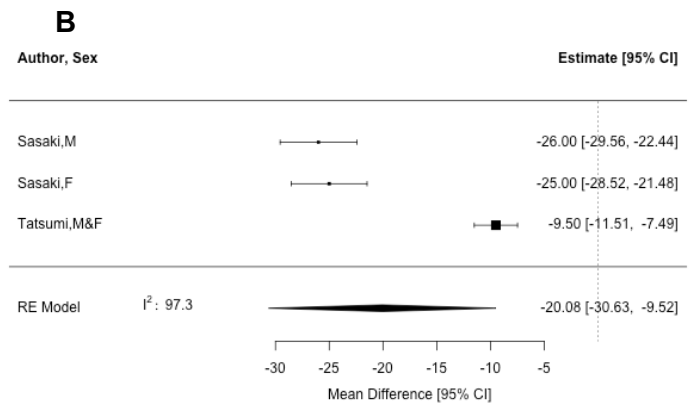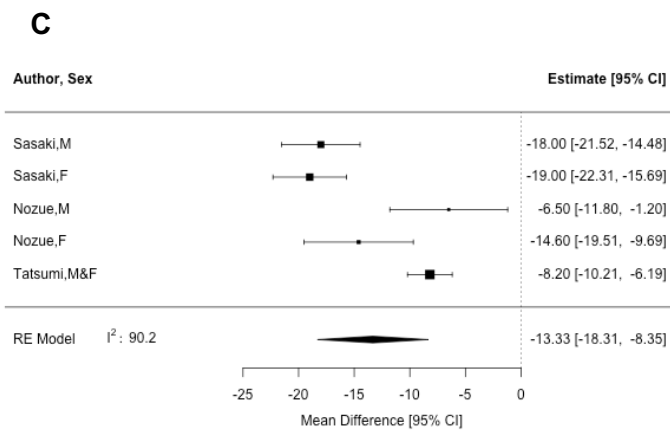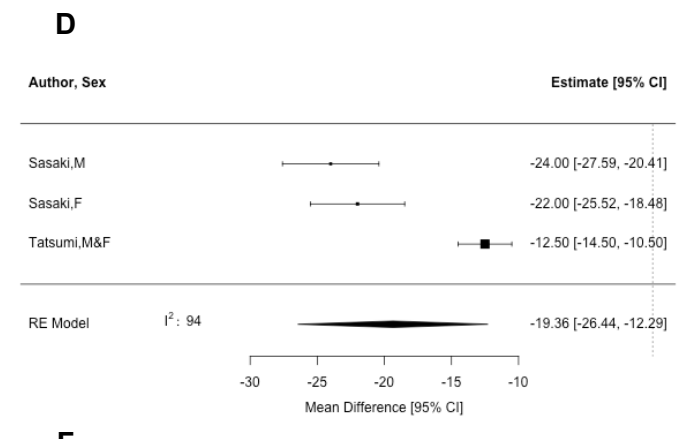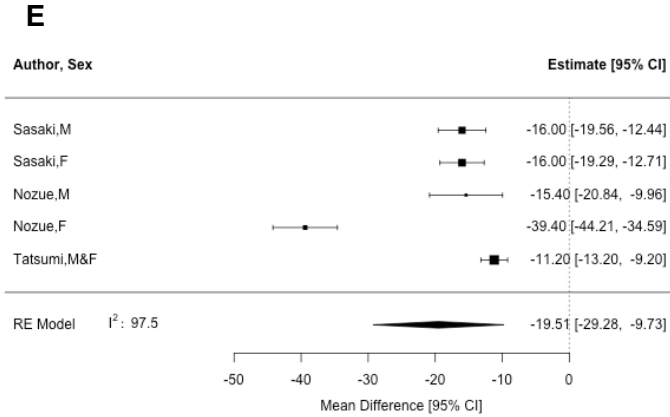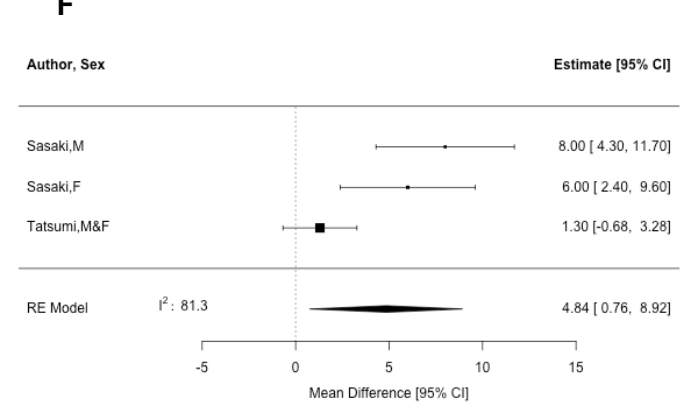

**eFigure 1.** Forest plot of the pooled mean differences in potato intakes. Spring vs Summer (A), Spring vs Fall (B), Spring vs Winter (C), Summer vs Fall (D), Summer vs Winter (E), Fall vs Winter (F). Mean differences were calculated by subtracting the intake in the right season from the intake in the left season. M indicates males and F indicates females.

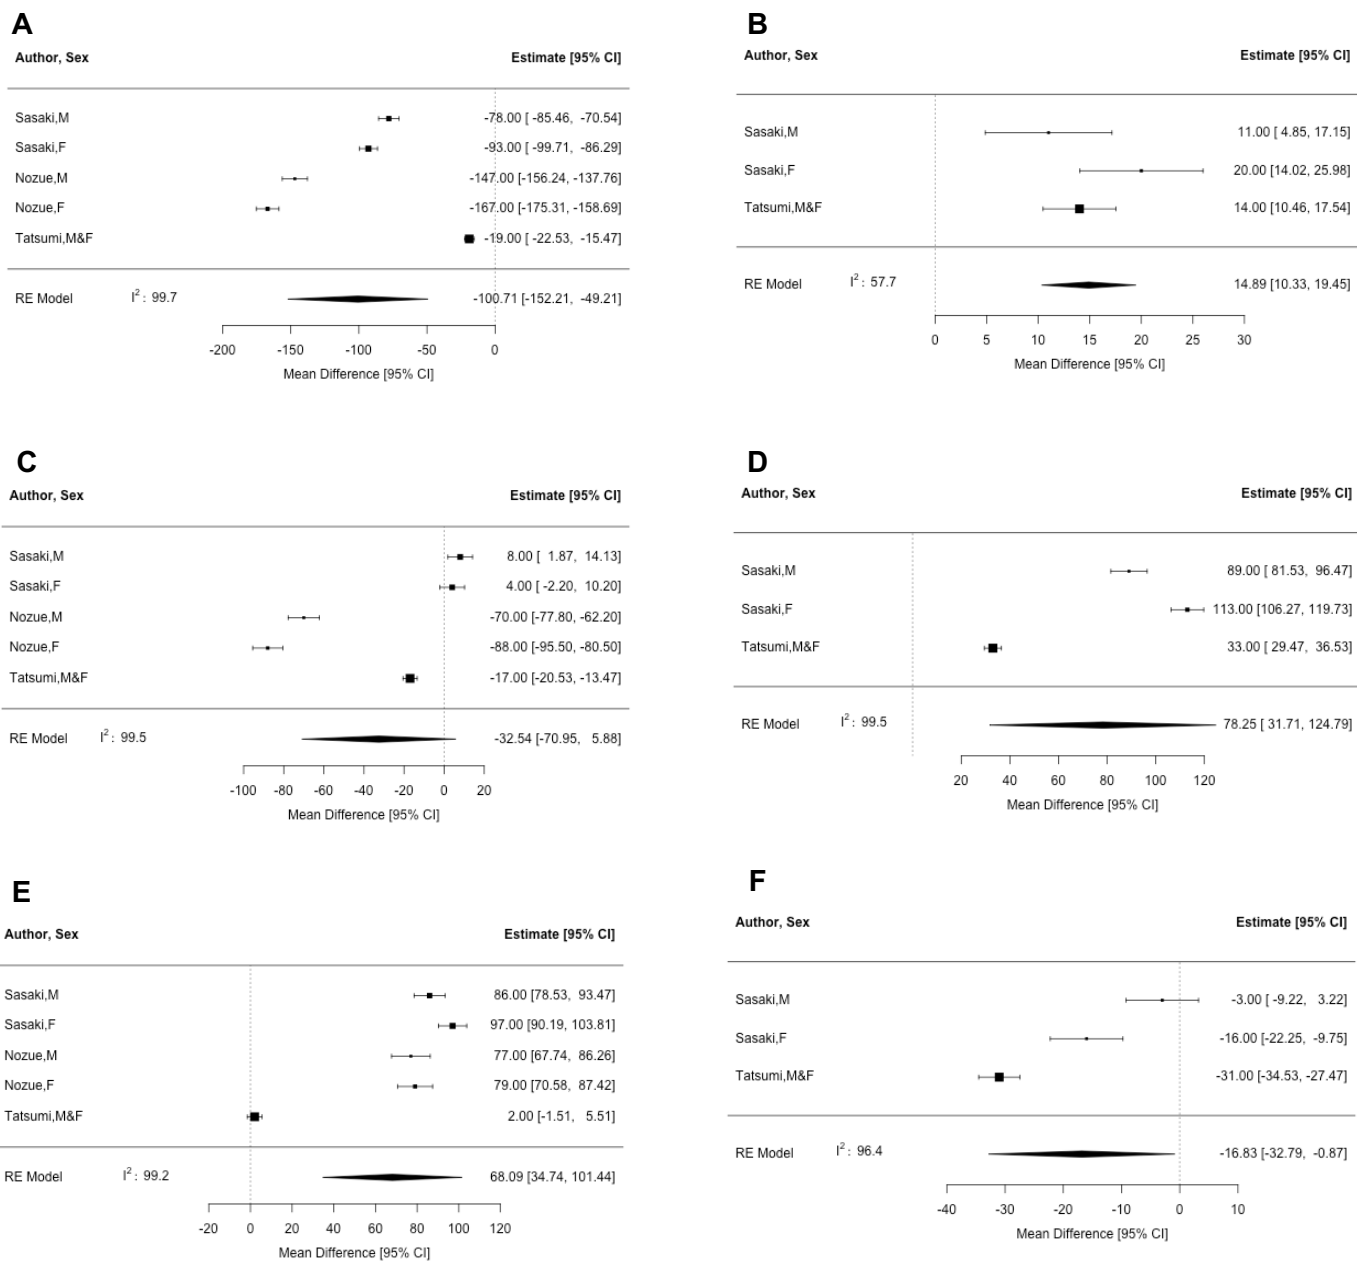

**Figure 2.** Forest plot of the pooled mean differences in vegetable intakes. Spring vs Summer (A), Spring vs Fall (B), Spring vs Winter (C), Summer vs Fall (D), Summer vs Winter (E), Fall vs Winter (F). Mean differences were calculated by subtracting the intake in the right season from the intake in the left season. M indicates males and F indicates females.

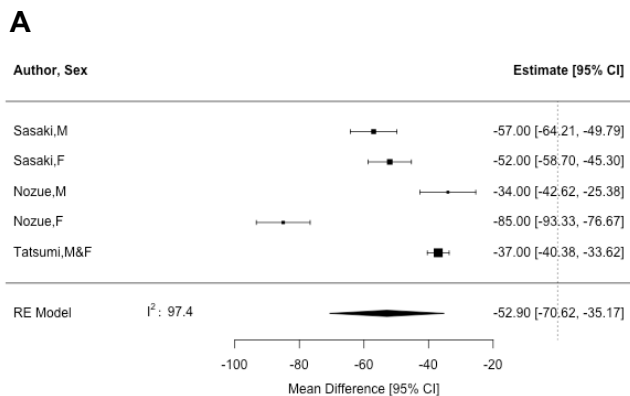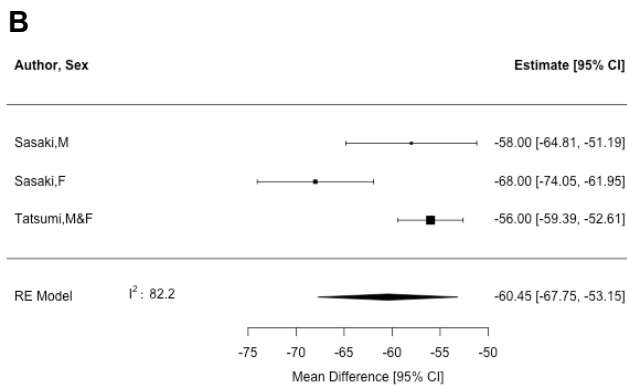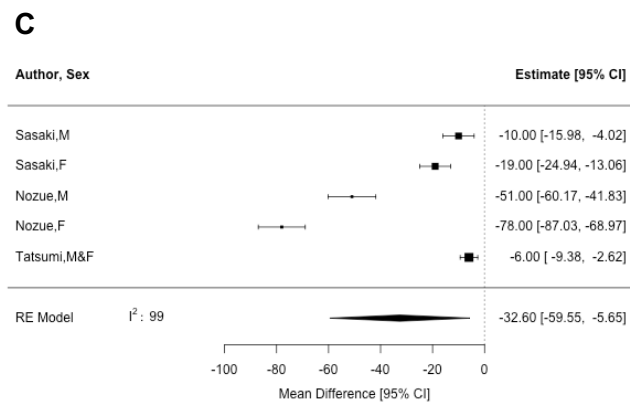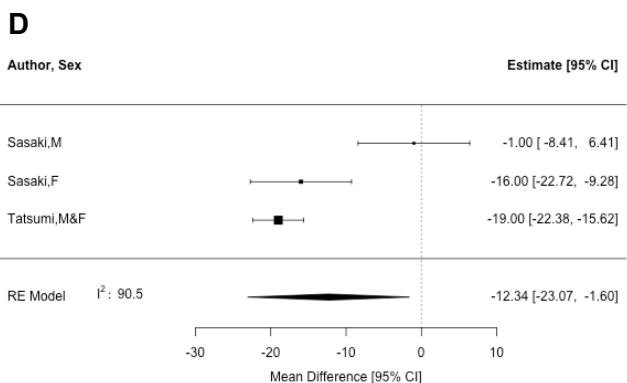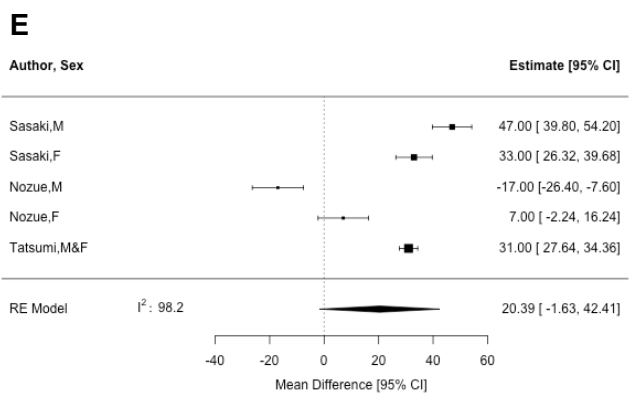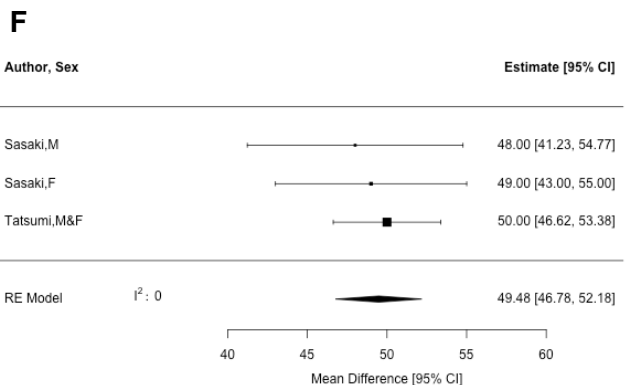

**Figure 3.** Forest plot of the pooled mean differences in fruit intakes. Spring vs Summer (A), Spring vs Fall (B), Spring vs Winter (C), Summer vs Fall (D), Summer vs Winter (E), Fall vs Winter (F). Mean differences were calculated by subtracting the intake in the right season from the intake in the left season. M indicates males and F indicates females.
